# Supplementary material for: Predicting COVID-19 progression from diagnosis to recovery or death linking primary care and hospital records in Castilla y León (Spain)
Source: PLOS journal article supplement (doi:10.1371/journal.pone.0257613), 2021-09-20
Supplement: S1 (10.1371/journal.pone.0257613.s001) [file journal.pone.0257613.s001.pdf]

S1 Table: Distribution of patients by pairwise comorbidities combinations and state (including only those with frequency of at least 100 hospitalised patients)

|                                                | INF    |       | FH1   |      | ICU |     | DEA   |      | REC    |      |
|------------------------------------------------|--------|-------|-------|------|-----|-----|-------|------|--------|------|
|                                                | n      | %     | n     | %    | n   | %   | n     | %    | n      | %    |
| Tobacco disorder + Cancer                      | 766    | 100.0 | 190   | 24.8 | 15  | 2.0 | 73    | 9.5  | 541    | 70.6 |
| Tobacco disorder + Psychiatric disorder        | 3,784  | 100.0 | 355   | 9.4  | 31  | 0.8 | 108   | 2.9  | 2,741  | 72.4 |
| Tobacco disorder + Diabetes                    | 828    | 100.0 | 197   | 23.8 | 21  | 2.5 | 78    | 9.4  | 555    | 67.0 |
| Tobacco disorder + Hypercholesterol            | 2,705  | 100.0 | 388   | 14.3 | 40  | 1.5 | 122   | 4.5  | 1,971  | 72.9 |
| Tobacco disorder + Hypertension                | 1,904  | 100.0 | 379   | 19.9 | 38  | 2.0 | 130   | 6.8  | 1,358  | 71.3 |
| Tobacco disorder + Hypothyroidism              | 708    | 100.0 | 54    | 7.6  | 3   | 0.4 | 18    | 2.5  | 533    | 75.3 |
| Tobacco disorder + Cardiovascular disease      | 1,230  | 100.0 | 258   | 21.0 | 20  | 1.6 | 121   | 9.8  | 858    | 69.8 |
| Tobacco disorder + Obesity                     | 1,219  | 100.0 | 176   | 14.4 | 26  | 2.1 | 59    | 4.8  | 874    | 71.7 |
| Tobacco disorder + Respiratory disease         | 4,271  | 100.0 | 498   | 11.7 | 42  | 1.0 | 162   | 3.8  | 3,098  | 72.5 |
| Tobacco disorder + Neurological disease        | 351    | 100.0 | 63    | 17.9 | 3   | 0.9 | 27    | 7.7  | 252    | 71.8 |
| Tobacco disorder + Hematological disorder      | 1,561  | 100.0 | 184   | 11.8 | 12  | 0.8 | 82    | 5.3  | 1,112  | 71.2 |
| Tobacco disorder + Liver disease               | 409    | 100.0 | 80    | 19.6 | 10  | 2.4 | 24    | 5.9  | 291    | 71.1 |
| Tobacco disorder + Kidney disease              | 381    | 100.0 | 96    | 25.2 | 7   | 1.8 | 49    | 12.9 | 252    | 66.1 |
| Tobacco disorder + Other chronic disease       | 1,783  | 100.0 | 315   | 17.7 | 22  | 1.2 | 135   | 7.6  | 1,255  | 70.4 |
| Cancer + Psychiatric disorder                  | 3,369  | 100.0 | 798   | 23.7 | 31  | 0.9 | 557   | 16.5 | 2,115  | 62.8 |
| Cancer + Diabetes                              | 1,354  | 100.0 | 470   | 34.7 | 21  | 1.6 | 297   | 21.9 | 819    | 60.5 |
| Cancer + Hypercholesterol                      | 2,930  | 100.0 | 786   | 26.8 | 38  | 1.3 | 468   | 16.0 | 1,848  | 63.1 |
| Cancer + Hypertension                          | 3,496  | 100.0 | 1043  | 29.8 | 43  | 1.2 | 671   | 19.2 | 2,125  | 60.8 |
| Cancer + Hypothyroidism                        | 877    | 100.0 | 164   | 18.7 | 10  | 1.1 | 111   | 12.7 | 567    | 64.7 |
| Cancer + Cardiovascular disease                | 2,357  | 100.0 | 763   | 32.4 | 27  | 1.1 | 559   | 23.7 | 1,366  | 58.0 |
| Cancer + Obesity                               | 1,146  | 100.0 | 323   | 28.2 | 22  | 1.9 | 194   | 16.9 | 732    | 63.9 |
| Cancer + Respiratory disease                   | 4,147  | 100.0 | 1086  | 26.2 | 46  | 1.1 | 708   | 17.1 | 2,625  | 63.3 |
| Cancer + Neurological disease                  | 815    | 100.0 | 219   | 26.9 | 2   | 0.2 | 225   | 27.6 | 441    | 54.1 |
| Cancer + Hematological disorder                | 2,094  | 100.0 | 523   | 25.0 | 19  | 0.9 | 363   | 17.3 | 1,317  | 62.9 |
| Cancer + Liver disease                         | 325    | 100.0 | 90    | 27.7 | 4   | 1.2 | 42    | 12.9 | 214    | 65.8 |
| Cancer + Kidney disease                        | 833    | 100.0 | 283   | 34.0 | 7   | 0.8 | 224   | 26.9 | 461    | 55.3 |
| Cancer + Cerebrovascular disease               | 287    | 100.0 | 81    | 28.2 |     |     | 74    | 25.8 | 162    | 56.4 |
| Cancer + Other chronic disease                 | 2,987  | 100.0 | 891   | 29.8 | 30  | 1.0 | 627   | 21.0 | 1,793  | 60.0 |
| Psychiatric disorder + Diabetes                | 3,529  | 100.0 | 920   | 26.1 | 62  | 1.8 | 647   | 18.3 | 2,180  | 61.8 |
| Psychiatric disorder + Hypercholesterol        | 9,582  | 100.0 | 1,740 | 18.2 | 106 | 1.1 | 1,028 | 10.7 | 6,345  | 66.2 |
| Psychiatric disorder + Hypertension            | 9,602  | 100.0 | 2,120 | 22.1 | 103 | 1.1 | 1,470 | 15.3 | 6,051  | 63.0 |
| Psychiatric disorder + Hypothyroidism          | 3,632  | 100.0 | 457   | 12.6 | 23  | 0.6 | 265   | 7.3  | 2,476  | 68.2 |
| Psychiatric disorder + Cardiovascular disease  | 5,966  | 100.0 | 1,445 | 24.2 | 62  | 1.0 | 1,117 | 18.7 | 3,624  | 60.7 |
| Psychiatric disorder + Obesity                 | 4,287  | 100.0 | 744   | 17.4 | 64  | 1.5 | 365   | 8.5  | 2,916  | 68.0 |
| Psychiatric disorder + Respiratory disease     | 15,074 | 100.0 | 2,345 | 15.6 | 122 | 0.8 | 1,480 | 9.8  | 10,020 | 66.5 |
| Psychiatric disorder + Neurological disease    | 3,034  | 100.0 | 662   | 21.8 | 20  | 0.7 | 618   | 20.4 | 1,744  | 57.5 |
| Psychiatric disorder + Hematological disorder  | 7,338  | 100.0 | 1,073 | 14.6 | 41  | 0.6 | 770   | 10.5 | 4,868  | 66.3 |
| Psychiatric disorder + Liver disease           | 1,137  | 100.0 | 199   | 17.5 | 18  | 1.6 | 80    | 7.0  | 783    | 68.9 |
| Psychiatric disorder + Kidney disease          | 2,006  | 100.0 | 520   | 25.9 | 14  | 0.7 | 430   | 21.4 | 1,187  | 59.2 |
| Psychiatric disorder + Cerebrovascular disease | 791    | 100.0 | 209   | 26.4 | 9   | 1.1 | 179   | 22.6 | 440    | 55.6 |
| Psychiatric disorder + Other chronic disease   | 8,793  | 100.0 | 1,863 | 21.2 | 77  | 0.9 | 1,342 | 15.3 | 5,539  | 63.0 |
| Diabetes + Hypercholesterol                    | 3,882  | 100.0 | 1,084 | 27.9 | 79  | 2.0 | 639   | 16.5 | 2,471  | 63.7 |
| Diabetes + Hypertension                        | 4,724  | 100.0 | 1,348 | 28.5 | 77  | 1.6 | 866   | 18.3 | 2,922  | 61.9 |
| Diabetes + Hypothyroidism                      | 912    | 100.0 | 219   | 24.0 | 15  | 1.6 | 137   | 15.0 | 578    | 63.4 |
| Diabetes + Cardiovascular disease              | 2,797  | 100.0 | 911   | 32.6 | 45  | 1.6 | 658   | 23.5 | 1,662  | 59.4 |
| Diabetes + Obesity                             | 2,121  | 100.0 | 565   | 26.6 | 50  | 2.4 | 292   | 13.8 | 1,386  | 65.3 |
| Diabetes + Respiratory disease                 | 4,415  | 100.0 | 1,218 | 27.6 | 71  | 1.6 | 789   | 17.9 | 2,775  | 62.9 |
| Diabetes + Neurological disease                | 971    | 100.0 | 258   | 26.6 | 6   | 0.6 | 251   | 25.8 | 535    | 55.1 |
| Diabetes + Hematological disorder              | 2,188  | 100.0 | 625   | 28.6 | 27  | 1.2 | 463   | 21.2 | 1,308  | 59.8 |
| Diabetes + Liver disease                       | 487    | 100.0 | 136   | 27.9 | 11  | 2.3 | 61    | 12.5 | 327    | 67.1 |
| Diabetes + Kidney disease                      | 1,160  | 100.0 | 423   | 36.5 | 16  | 1.4 | 320   | 27.6 | 654    | 56.4 |
| Diabetes + Cerebrovascular disease             | 328    | 100.0 | 86    | 26.2 | 5   | 1.5 | 85    | 25.9 | 186    | 56.7 |
| Diabetes + Other chronic disease               | 3,874  | 100.0 | 1190  | 30.7 | 62  | 1.6 | 829   | 21.4 | 2,352  | 60.7 |
| Hypercholesterol + Hypertension                | 9,637  | 100.0 | 2,249 | 23.3 | 151 | 1.6 | 1,287 | 13.4 | 6,241  | 64.8 |
| Hypercholesterol + Hypothyroidism              | 2,809  | 100.0 | 439   | 15.6 | 27  | 1.0 | 223   | 7.9  | 1,924  | 68.5 |
| Hypercholesterol + Cardiovascular disease      | 5,312  | 100.0 | 1,422 | 26.8 | 74  | 1.4 | 965   | 18.2 | 3,299  | 62.1 |
| Hypercholesterol + Obesity                     | 3,974  | 100.0 | 831   | 20.9 | 86  | 2.2 | 380   | 9.6  | 2,709  | 68.2 |
| Hypercholesterol + Respiratory disease         | 11,139 | 100.0 | 2,203 | 19.8 | 143 | 1.3 | 1,203 | 10.8 | 7,482  | 67.2 |
| Hypercholesterol + Neurological disease        | 2,121  | 100.0 | 530   | 25.0 | 18  | 0.8 | 432   | 20.4 | 1,226  | 57.8 |
| Hypercholesterol + Hematological disorder      | 4,748  | 100.0 | 951   | 20.0 | 48  | 1.0 | 607   | 12.8 | 3,099  | 65.3 |
| Hypercholesterol + Liver disease               | 1,027  | 100.0 | 219   | 21.3 | 27  | 2.6 | 69    | 6.7  | 732    | 71.3 |
| Hypercholesterol + Kidney disease              | 1,922  | 100.0 | 583   | 30.3 | 23  | 1.2 | 421   | 21.9 | 1,157  | 60.2 |

Continued on next page

S1 Table – continued from previous page

|                                                  | INF    |       | FH1   |      | ICU |     | DEA   |      | REC   |      |
|--------------------------------------------------|--------|-------|-------|------|-----|-----|-------|------|-------|------|
|                                                  | n      | %     | n     | %    | n   | %   | n     | %    | n     | %    |
| Hypercholesterol + Cerebrovascular disease       | 646    | 100.0 | 154   | 23.8 | 7   | 1.1 | 132   | 20.4 | 358   | 55.4 |
| Hypercholesterol + Other chronic disease         | 6,688  | 100.0 | 1,652 | 24.7 | 83  | 1.2 | 1,070 | 16.0 | 4,249 | 63.5 |
| Hypertension + Hypothyroidism                    | 2,388  | 100.0 | 488   | 20.4 | 27  | 1.1 | 297   | 12.4 | 1,524 | 63.8 |
| Hypertension + Cardiovascular disease            | 6,891  | 100.0 | 1,983 | 28.8 | 87  | 1.3 | 1,419 | 20.6 | 4,153 | 60.3 |
| Hypertension + Obesity                           | 4,741  | 100.0 | 1,064 | 22.4 | 95  | 2.0 | 523   | 11.0 | 3,176 | 67.0 |
| Hypertension + Respiratory disease               | 11,410 | 100.0 | 2,681 | 23.5 | 145 | 1.3 | 1,704 | 14.9 | 7,258 | 63.6 |
| Hypertension + Neurological disease              | 2,495  | 100.0 | 625   | 25.1 | 17  | 0.7 | 556   | 22.3 | 1,422 | 57.0 |
| Hypertension + Hematological disorder            | 5,190  | 100.0 | 1,280 | 24.7 | 52  | 1.0 | 905   | 17.4 | 3,193 | 61.5 |
| Hypertension + Liver disease                     | 941    | 100.0 | 221   | 23.5 | 20  | 2.1 | 94    | 10.0 | 644   | 68.4 |
| Hypertension + Kidney disease                    | 2,677  | 100.0 | 835   | 31.2 | 26  | 1.0 | 630   | 23.5 | 1,559 | 58.2 |
| Hypertension + Cerebrovascular disease           | 882    | 100.0 | 237   | 26.9 | 10  | 1.1 | 200   | 22.7 | 497   | 56.3 |
| Hypertension + Other chronic disease             | 8,003  | 100.0 | 2,197 | 27.5 | 85  | 1.1 | 1,556 | 19.4 | 4,870 | 60.9 |
| Hypothyroidism + Cardiovascular disease          | 1,481  | 100.0 | 337   | 22.8 | 17  | 1.1 | 235   | 15.9 | 947   | 63.9 |
| Hypothyroidism + Obesity                         | 1,276  | 100.0 | 210   | 16.5 | 12  | 0.9 | 89    | 7.0  | 916   | 71.8 |
| Hypothyroidism + Respiratory disease             | 3,996  | 100.0 | 563   | 14.1 | 34  | 0.9 | 306   | 7.7  | 2,743 | 68.6 |
| Hypothyroidism + Neurological disease            | 678    | 100.0 | 128   | 18.9 | 2   | 0.3 | 106   | 15.6 | 398   | 58.7 |
| Hypothyroidism + Hematological disorder          | 2,433  | 100.0 | 297   | 12.2 | 15  | 0.6 | 180   | 7.4  | 1,692 | 69.5 |
| Hypothyroidism + Liver disease                   | 305    | 100.0 | 51    | 16.7 | 4   | 1.3 | 15    | 4.9  | 215   | 70.5 |
| Hypothyroidism + Kidney disease                  | 565    | 100.0 | 142   | 25.1 | 7   | 1.2 | 105   | 18.6 | 344   | 60.9 |
| Hypothyroidism + Cerebrovascular disease         | 179    | 100.0 | 30    | 16.8 |     |     | 32    | 17.9 | 102   | 57.0 |
| Hypothyroidism + Other chronic disease           | 2,321  | 100.0 | 419   | 18.1 | 21  | 0.9 | 267   | 11.5 | 1,556 | 67.0 |
| Cardiovascular disease + Obesity                 | 2,286  | 100.0 | 643   | 28.1 | 39  | 1.7 | 381   | 16.7 | 1,477 | 64.6 |
| Cardiovascular disease + Respiratory disease     | 7,679  | 100.0 | 2,021 | 26.3 | 93  | 1.2 | 1,415 | 18.4 | 4,761 | 62.0 |
| Cardiovascular disease + Neurological disease    | 1,627  | 100.0 | 436   | 26.8 | 13  | 0.8 | 434   | 26.7 | 888   | 54.6 |
| Cardiovascular disease + Hematological disorder  | 3,643  | 100.0 | 975   | 26.8 | 26  | 0.7 | 755   | 20.7 | 2,241 | 61.5 |
| Cardiovascular disease + Liver disease           | 560    | 100.0 | 149   | 26.6 | 11  | 2.0 | 73    | 13.0 | 371   | 66.2 |
| Cardiovascular disease + Kidney disease          | 1,834  | 100.0 | 642   | 35.0 | 19  | 1.0 | 528   | 28.8 | 997   | 54.4 |
| Cardiovascular disease + Cerebrovascular disease | 627    | 100.0 | 179   | 28.5 | 10  | 1.6 | 153   | 24.4 | 349   | 55.7 |
| Cardiovascular disease + Other chronic disease   | 6,455  | 100.0 | 1,900 | 29.4 | 68  | 1.1 | 1412  | 21.9 | 3,840 | 59.5 |
| Obesity + Respiratory disease                    | 5,345  | 100.0 | 994   | 18.6 | 94  | 1.8 | 476   | 8.9  | 3,673 | 68.7 |
| Obesity + Neurological disease                   | 723    | 100.0 | 166   | 23.0 | 9   | 1.2 | 120   | 16.6 | 459   | 63.5 |
| Obesity + Hematological disorder                 | 2,216  | 100.0 | 441   | 19.9 | 32  | 1.4 | 241   | 10.9 | 1,476 | 66.6 |
| Obesity + Liver disease                          | 535    | 100.0 | 119   | 22.2 | 16  | 3.0 | 37    | 6.9  | 384   | 71.8 |
| Obesity + Kidney disease                         | 834    | 100.0 | 254   | 30.5 | 12  | 1.4 | 184   | 22.1 | 488   | 58.5 |
| Obesity + Cerebrovascular disease                | 228    | 100.0 | 49    | 21.5 | 3   | 1.3 | 44    | 19.3 | 134   | 58.8 |
| Obesity + Other chronic disease                  | 3,070  | 100.0 | 744   | 24.2 | 54  | 1.8 | 412   | 13.4 | 2,014 | 65.6 |
| Respiratory disease + Neurological disease       | 2,991  | 100.0 | 676   | 22.6 | 20  | 0.7 | 601   | 20.1 | 1,769 | 59.1 |
| Respiratory disease + Hematological disorder     | 8,379  | 100.0 | 1,350 | 16.1 | 56  | 0.7 | 932   | 11.1 | 5,530 | 66.0 |
| Respiratory disease + Liver disease              | 1,308  | 100.0 | 272   | 20.8 | 26  | 2.0 | 103   | 7.9  | 911   | 69.6 |
| Respiratory disease + Kidney disease             | 2,609  | 100.0 | 737   | 28.2 | 22  | 0.8 | 584   | 22.4 | 1,536 | 58.9 |
| Respiratory disease + Cerebrovascular disease    | 875    | 100.0 | 224   | 25.6 | 9   | 1.0 | 201   | 23.0 | 499   | 57.0 |
| Respiratory disease + Other chronic disease      | 10,793 | 100.0 | 2,383 | 22.1 | 105 | 1.0 | 1,602 | 14.8 | 6,918 | 64.1 |
| Neurological disease + Hematological disorder    | 1,483  | 100.0 | 330   | 22.3 | 7   | 0.5 | 321   | 21.6 | 854   | 57.6 |
| Neurological disease + Liver disease             | 187    | 100.0 | 45    | 24.1 |     |     | 23    | 12.3 | 121   | 64.7 |
| Neurological disease + Kidney disease            | 578    | 100.0 | 162   | 28.0 | 2   | 0.3 | 157   | 27.2 | 323   | 55.9 |
| Neurological disease + Cerebrovascular disease   | 319    | 100.0 | 79    | 24.8 | 4   | 1.3 | 82    | 25.7 | 162   | 50.8 |
| Neurological disease + Other chronic disease     | 2,624  | 100.0 | 649   | 24.7 | 14  | 0.5 | 589   | 22.4 | 1,498 | 57.1 |
| Hematological disorder + Liver disease           | 575    | 100.0 | 123   | 21.4 | 7   | 1.2 | 61    | 10.6 | 389   | 67.7 |
| Hematological disorder + Kidney disease          | 1,540  | 100.0 | 443   | 28.8 | 8   | 0.5 | 373   | 24.2 | 877   | 56.9 |
| Hematological disorder + Cerebrovascular disease | 452    | 100.0 | 112   | 24.8 | 3   | 0.7 | 100   | 22.1 | 262   | 58.0 |
| Hematological disorder + Other chronic disease   | 5,217  | 100.0 | 1,173 | 22.5 | 36  | 0.7 | 860   | 16.5 | 3,280 | 62.9 |
| Liver disease + Kidney disease                   | 208    | 100.0 | 62    | 29.8 | 2   | 1.0 | 35    | 16.8 | 128   | 61.5 |
| Liver disease + Other chronic disease            | 853    | 100.0 | 219   | 25.7 | 17  | 2.0 | 97    | 11.4 | 568   | 66.6 |
| Kidney disease + Cerebrovascular disease         | 222    | 100.0 | 76    | 34.2 | 2   | 0.9 | 70    | 31.5 | 117   | 52.7 |
| Kidney disease + Other chronic disease           | 2,216  | 100.0 | 723   | 32.6 | 21  | 0.9 | 569   | 25.7 | 1,266 | 57.1 |
| Cerebrovascular disease + Other chronic disease  | 822    | 100.0 | 230   | 28.0 | 10  | 1.2 | 204   | 24.8 | 462   | 56.2 |
