# Supplementary material for: Predicting COVID-19 progression from diagnosis to recovery or death linking primary care and hospital records in Castilla y León (Spain)
Source: PLOS journal article supplement (doi:10.1371/journal.pone.0257613), 2021-09-20
Supplement: S2 (10.1371/journal.pone.0257613.s002) [file journal.pone.0257613.s002.pdf]

S2 Table: Distribution of patients by pairwise drug therapies combinations and state (including only those with frequency of at least 100 hospitalised patients).

|                                              | FH1   |       | ICU |      | DEA |      | REC  |      |
|----------------------------------------------|-------|-------|-----|------|-----|------|------|------|
|                                              | n     | %     | n   | %    | n   | %    | n    | %    |
| METHYLPREDNISOLONE + PREDNISONE              | 775   | 100.0 | 54  | 7.0  | 180 | 23.2 | 592  | 76.4 |
| METHYLPREDNISOLONE + CEFTRIAZONE             | 2,155 | 100.0 | 175 | 8.1  | 709 | 32.9 | 1434 | 66.5 |
| METHYLPREDNISOLONE + CEFDITOREN              | 283   | 100.0 | 15  | 5.3  | 64  | 22.6 | 218  | 77.0 |
| METHYLPREDNISOLONE + CLARITHROMYCIN          | 145   | 100.0 | 14  | 9.7  | 36  | 24.8 | 109  | 75.2 |
| METHYLPREDNISOLONE + AZITHROMYCIN            | 2,316 | 100.0 | 196 | 8.5  | 723 | 31.2 | 1577 | 68.1 |
| METHYLPREDNISOLONE + LEVOFLOXACIN            | 1,056 | 100.0 | 75  | 7.1  | 360 | 34.1 | 687  | 65.1 |
| METHYLPREDNISOLONE + LOPINAVIR AND RITONAVIR | 1,348 | 100.0 | 180 | 13.4 | 379 | 28.1 | 955  | 70.8 |
| METHYLPREDNISOLONE + INTERFERON BETA-1B      | 206   | 100.0 | 64  | 31.1 | 70  | 34.0 | 133  | 64.6 |
| METHYLPREDNISOLONE + TOCILIZUMAB             | 330   | 100.0 | 125 | 37.9 | 79  | 23.9 | 242  | 73.3 |
| METHYLPREDNISOLONE + CHLOROQUINE             | 207   | 100.0 | 26  | 12.6 | 58  | 28.0 | 147  | 71.0 |
| METHYLPREDNISOLONE + HIDROXICHLOROQUINE      | 2,093 | 100.0 | 202 | 9.7  | 625 | 29.9 | 1452 | 69.4 |
| PREDNISONE + CEFTRIAZONE                     | 715   | 100.0 | 47  | 6.6  | 165 | 23.1 | 549  | 76.8 |
| PREDNISONE + CEFDITOREN                      | 210   | 100.0 | 16  | 7.6  | 42  | 20.0 | 166  | 79.0 |
| PREDNISONE + CLARITHROMYCIN                  | 165   | 100.0 | 18  | 10.9 | 34  | 20.6 | 130  | 78.8 |
| PREDNISONE + AZITHROMYCIN                    | 923   | 100.0 | 60  | 6.5  | 191 | 20.7 | 724  | 78.4 |
| PREDNISONE + LEVOFLOXACIN                    | 528   | 100.0 | 35  | 6.6  | 128 | 24.2 | 394  | 74.6 |
| PREDNISONE + LOPINAVIR AND RITONAVIR         | 447   | 100.0 | 48  | 10.7 | 91  | 20.4 | 355  | 79.4 |
| PREDNISONE + TOCILIZUMAB                     | 161   | 100.0 | 50  | 31.1 | 20  | 12.4 | 139  | 86.3 |
| PREDNISONE + HIDROXICHLOROQUINE              | 771   | 100.0 | 61  | 7.9  | 154 | 20.0 | 615  | 79.8 |
| CEFTRIAZONE + CEFDITOREN                     | 408   | 100.0 | 11  | 2.7  | 52  | 12.7 | 356  | 87.3 |
| CEFTRIAZONE + CLARITHROMYCIN                 | 114   | 100.0 | 12  | 10.5 | 23  | 20.2 | 91   | 79.8 |
| CEFTRIAZONE + AZITHROMYCIN                   | 3,781 | 100.0 | 263 | 7.0  | 996 | 26.3 | 2771 | 73.3 |
| CEFTRIAZONE + LEVOFLOXACIN                   | 1,071 | 100.0 | 78  | 7.3  | 368 | 34.4 | 697  | 65.1 |
| CEFTRIAZONE + LOPINAVIR AND RITONAVIR        | 2,158 | 100.0 | 262 | 12.1 | 509 | 23.6 | 1638 | 75.9 |
| CEFTRIAZONE + INTERFERON BETA-1B             | 288   | 100.0 | 92  | 31.9 | 96  | 33.3 | 191  | 66.3 |
| CEFTRIAZONE + TOCILIZUMAB                    | 406   | 100.0 | 150 | 36.9 | 92  | 22.7 | 306  | 75.4 |
| CEFTRIAZONE + CHLOROQUINE                    | 328   | 100.0 | 47  | 14.3 | 106 | 32.3 | 222  | 67.7 |
| CEFTRIAZONE + HIDROXICHLOROQUINE             | 3,248 | 100.0 | 271 | 8.3  | 799 | 24.6 | 2437 | 75.0 |
| CEFDITOREN + AZITHROMYCIN                    | 463   | 100.0 | 20  | 4.3  | 76  | 16.4 | 385  | 83.2 |
| CEFDITOREN + LEVOFLOXACIN                    | 234   | 100.0 | 21  | 9.0  | 64  | 27.4 | 168  | 71.8 |
| CEFDITOREN + LOPINAVIR AND RITONAVIR         | 208   | 100.0 | 17  | 8.2  | 34  | 16.3 | 173  | 83.2 |
| CEFDITOREN + HIDROXICHLOROQUINE              | 394   | 100.0 | 22  | 5.6  | 63  | 16.0 | 330  | 83.8 |
| CLARITHROMYCIN + AZITHROMYCIN                | 178   | 100.0 | 20  | 11.2 | 38  | 21.3 | 139  | 78.1 |
| CLARITHROMYCIN + LEVOFLOXACIN                | 169   | 100.0 | 20  | 11.8 | 37  | 21.9 | 131  | 77.5 |
| CLARITHROMYCIN + HIDROXICHLOROQUINE          | 158   | 100.0 | 19  | 12.0 | 32  | 20.3 | 126  | 79.7 |
| AZITHROMYCIN + LEVOFLOXACIN                  | 1,304 | 100.0 | 96  | 7.4  | 386 | 29.6 | 905  | 69.4 |
| AZITHROMYCIN + MOXIFLOXACINO                 | 136   | 100.0 | 11  | 8.1  | 23  | 16.9 | 112  | 82.4 |
| AZITHROMYCIN + LOPINAVIR AND RITONAVIR       | 2,423 | 100.0 | 271 | 11.2 | 525 | 21.7 | 1885 | 77.8 |
| AZITHROMYCIN + INTERFERON BETA-1B            | 304   | 100.0 | 102 | 33.6 | 92  | 30.3 | 210  | 69.1 |
| AZITHROMYCIN + TOCILIZUMAB                   | 512   | 100.0 | 173 | 33.8 | 109 | 21.3 | 394  | 77.0 |
| AZITHROMYCIN + CHLOROQUINE                   | 259   | 100.0 | 41  | 15.8 | 94  | 36.3 | 165  | 63.7 |
| AZITHROMYCIN + HIDROXICHLOROQUINE            | 3,882 | 100.0 | 311 | 8.0  | 855 | 22.0 | 3011 | 77.6 |
| LEVOFLOXACIN + MOXIFLOXACINO                 | 102   | 100.0 | 11  | 10.8 | 16  | 15.7 | 85   | 83.3 |
| LEVOFLOXACIN + LOPINAVIR AND RITONAVIR       | 771   | 100.0 | 94  | 12.2 | 252 | 32.7 | 511  | 66.3 |
| LEVOFLOXACIN + INTERFERON BETA-1B            | 113   | 100.0 | 38  | 33.6 | 37  | 32.7 | 74   | 65.5 |
| LEVOFLOXACIN + TOCILIZUMAB                   | 161   | 100.0 | 68  | 42.2 | 36  | 22.4 | 120  | 74.5 |
| LEVOFLOXACIN + HIDROXICHLOROQUINE            | 1,159 | 100.0 | 105 | 9.1  | 357 | 30.8 | 794  | 68.5 |
| MOXIFLOXACINO + HIDROXICHLOROQUINE           | 109   | 100.0 | 8   | 7.3  | 21  | 19.3 | 88   | 80.7 |
| LOPINAVIR AND RITONAVIR + INTERFERON BETA-1B | 369   | 100.0 | 108 | 29.3 | 120 | 32.5 | 246  | 66.7 |
| LOPINAVIR AND RITONAVIR + TOCILIZUMAB        | 487   | 100.0 | 172 | 35.3 | 120 | 24.6 | 358  | 73.5 |
| LOPINAVIR AND RITONAVIR + CHLOROQUINE        | 348   | 100.0 | 51  | 14.7 | 91  | 26.1 | 254  | 73.0 |
| LOPINAVIR AND RITONAVIR + HIDROXICHLOROQUINE | 2,754 | 100.0 | 307 | 11.1 | 661 | 24.0 | 2079 | 75.5 |
| INTERFERON BETA-1B + HIDROXICHLOROQUINE      | 393   | 100.0 | 123 | 31.3 | 131 | 33.3 | 259  | 65.9 |
| TOCILIZUMAB + HIDROXICHLOROQUINE             | 508   | 100.0 | 179 | 35.2 | 124 | 24.4 | 375  | 73.8 |
| CHLOROQUINE + HIDROXICHLOROQUINE             | 106   | 100.0 | 30  | 28.3 | 31  | 29.2 | 74   | 69.8 |
