# Supplementary material for: Predicting COVID-19 progression from diagnosis to recovery or death linking primary care and hospital records in Castilla y León (Spain)
Source: PLOS journal article supplement (doi:10.1371/journal.pone.0257613), 2021-09-20
Supplement: S3 (10.1371/journal.pone.0257613.s003) [file journal.pone.0257613.s003.pdf]

S3 Table: Coefficients and p-values for the final model obtained

|                                    | coef  | exp(coef) | robust se | z      | p        |
|------------------------------------|-------|-----------|-----------|--------|----------|
| Age:INF->FH1                       | 0.03  | 1.03      | 0.00      | 39.48  | < 2e-16  |
| Age:INF->DEA                       | 0.11  | 1.11      | 0.00      | 48.64  | < 2e-16  |
| Age:INF->REC                       | -0.00 | 1.00      | 0.00      | -17.16 | < 2e-16  |
| Age:FH1->ICU                       | -0.03 | 0.97      | 0.00      | -11.86 | < 2e-16  |
| Age:FH1->DEA                       | 0.05  | 1.05      | 0.00      | 20.71  | < 2e-16  |
| Age:FH1->REC                       | -0.02 | 0.98      | 0.00      | -17.20 | < 2e-16  |
| Age:FH2->DEA                       | 0.05  | 1.05      | 0.01      | 5.85   | < 2e-16  |
| Age:FH2->REC                       | -0.02 | 0.98      | 0.00      | -3.79  | < 2e-16  |
| Female:INF->FH1                    | -0.41 | 0.67      | 0.02      | -16.99 | < 2e-16  |
| Female:INF->DEA                    | -0.57 | 0.57      | 0.05      | -11.84 | < 2e-16  |
| Female:FH1->ICU                    | -0.46 | 0.63      | 0.11      | -4.28  | < 2e-16  |
| Female:FH1->REC                    | 0.12  | 1.12      | 0.03      | 3.61   | < 2e-16  |
| StartApril:INF->FH1                | -0.12 | 0.89      | 0.03      | -4.47  | < 2e-16  |
| StartApril:INF->DEA                | -0.48 | 0.62      | 0.05      | -9.11  | < 2e-16  |
| StartApril:INF->REC                | 0.57  | 1.77      | 0.01      | 50.38  | < 2e-16  |
| StartApril:FH1->ICU                | -1.01 | 0.36      | 0.12      | -8.61  | < 2e-16  |
| StartApril:FH1->REC                | 0.33  | 1.40      | 0.03      | 9.88   | < 2e-16  |
| StartApril:ICU->FH2                | 0.59  | 1.81      | 0.14      | 4.39   | < 2e-16  |
| StartApril:FH2->REC                | 0.52  | 1.69      | 0.12      | 4.53   | < 2e-16  |
| StartMay:INF->FH1                  | -0.17 | 0.84      | 0.04      | -4.21  | < 2e-16  |
| StartMay:INF->DEA                  | -1.22 | 0.30      | 0.14      | -8.89  | < 2e-16  |
| StartMay:INF->REC                  | 2.08  | 8.02      | 0.02      | 123.55 | < 2e-16  |
| StartMay:FH1->ICU                  | -1.06 | 0.35      | 0.28      | -3.78  | < 2e-16  |
| StartMay:FH1->REC                  | 0.76  | 2.15      | 0.06      | 12.09  | < 2e-16  |
| Tobacco-related disorders:INF->REC | 0.05  | 1.06      | 0.02      | 3.50   | < 2e-16  |
| Cancer:INF->FH1                    | 0.17  | 1.19      | 0.03      | 5.42   | < 2e-16  |
| Cancer:FH1->DEA                    | 0.19  | 1.21      | 0.05      | 3.80   | < 2e-16  |
| Cancer:FH1->REC                    | -0.20 | 0.82      | 0.04      | -4.40  | < 2e-16  |
| Psychiatric disorder:INF->DEA      | 0.27  | 1.31      | 0.05      | 5.41   | < 2e-16  |
| Diabetes:INF->FH1                  | 0.20  | 1.22      | 0.03      | 6.52   | < 2e-16  |
| Diabetes:INF->DEA                  | 0.26  | 1.30      | 0.05      | 4.82   | < 2e-16  |
| Hypercholesterol:INF->FH1          | 0.10  | 1.11      | 0.02      | 4.10   | < 2e-16  |
| Hypercholesterol:INF->REC          | 0.03  | 1.03      | 0.01      | 2.83   | 5.00e-03 |
| Hypertension:INF->FH1              | 0.07  | 1.08      | 0.03      | 2.76   | 6.00e-03 |
| Cardiovascular disease:INF->FH1    | 0.10  | 1.11      | 0.03      | 3.55   | < 2e-16  |
| Cardiovascular disease:FH1->DEA    | 0.20  | 1.22      | 0.05      | 4.23   | < 2e-16  |
| Obesity:INF->FH1                   | 0.10  | 1.10      | 0.03      | 3.07   | 2.00e-03 |
| Obesity:FH1->ICU                   | 0.38  | 1.46      | 0.11      | 3.45   | 1.00e-03 |
| Neurological disease:INF->DEA      | 0.47  | 1.60      | 0.06      | 8.32   | < 2e-16  |
| Neurological disease:INF->REC      | -0.08 | 0.92      | 0.02      | -3.78  | < 2e-16  |
| Neurological disease:FH1->DEA      | 0.25  | 1.28      | 0.06      | 4.47   | < 2e-16  |
| Neurological disease:FH1->REC      | -0.28 | 0.75      | 0.05      | -5.48  | < 2e-16  |
| Liver disease:INF->FH1             | 0.15  | 1.16      | 0.05      | 2.71   | 7.00e-03 |
| Kidney disease:INF->DEA            | 0.20  | 1.22      | 0.06      | 3.18   | 1.00e-03 |
| Kidney disease:FH1->REC            | -0.21 | 0.81      | 0.05      | -4.14  | < 2e-16  |
| Other chronic disease:INF->FH1     | 0.16  | 1.17      | 0.03      | 5.84   | < 2e-16  |
| Other chronic disease:INF->DEA     | 0.16  | 1.17      | 0.05      | 3.01   | 3.00e-03 |
| Other chronic disease:FH1->REC     | -0.15 | 0.86      | 0.04      | -4.25  | < 2e-16  |
| Flu19 vaccine:FH1->DEA             | 0.21  | 1.23      | 0.05      | 4.26   | < 2e-16  |
| Pneumococcal vaccine:INF->FH1      | 0.29  | 1.34      | 0.06      | 4.52   | < 2e-16  |
| Pneumococcal vaccine:INF->REC      | 0.19  | 1.21      | 0.03      | 6.46   | < 2e-16  |
| Pneumococcal vaccine:FH1->REC      | 0.24  | 1.27      | 0.07      | 3.35   | 1.00e-03 |
| Pneumonia:INF->FH1                 | 2.52  | 12.42     | 0.03      | 94.03  | < 2e-16  |
| Pneumonia:INF->REC                 | -0.59 | 0.56      | 0.04      | -16.46 | < 2e-16  |
| Pneumonia:FH1->REC                 | 0.13  | 1.13      | 0.03      | 3.86   | < 2e-16  |
| Respiratory failure:FH1->ICU       | 0.63  | 1.87      | 0.15      | 4.11   | < 2e-16  |
| Respiratory failure:FH1->REC       | -0.30 | 0.74      | 0.07      | -4.28  | < 2e-16  |
| Tromboembolism event:FH1->DEA      | -1.36 | 0.26      | 0.28      | -4.82  | < 2e-16  |
| Septic shock:FH1->REC              | -0.67 | 0.51      | 0.16      | -4.08  | < 2e-16  |
| Bilateral Pneumonia:FH1->ICU       | 0.36  | 1.43      | 0.11      | 3.23   | 1.00e-03 |
| Methylprednisolone:FH1->REC        | -0.38 | 0.68      | 0.03      | -12.11 | < 2e-16  |
| Methylprednisolone:ICU->FH2        | -0.48 | 0.62      | 0.10      | -4.83  | < 2e-16  |
| Methylprednisolone:FH2->REC        | -0.28 | 0.76      | 0.10      | -2.85  | 4.00e-03 |
| Prednisone:FH1->DEA                | -0.52 | 0.59      | 0.07      | -7.73  | < 2e-16  |

Continued on next page

S3 Table – continued from previous page

|                             | coef  | exp(coef) | robust se | z     | p        |
|-----------------------------|-------|-----------|-----------|-------|----------|
| Prednisone:FH2->DEA         | -1.07 | 0.34      | 0.32      | -3.32 | 1.00e-03 |
| Cefditoren:FH1->DEA         | -0.28 | 0.76      | 0.10      | -2.77 | 6.00e-03 |
| Azithromycin:FH1->DEA       | -0.35 | 0.70      | 0.05      | -7.61 | < 2e-16  |
| Levofloxacin:FH1->REC       | -0.15 | 0.86      | 0.04      | -4.02 | < 2e-16  |
| Teicoplanin:FH1->ICU        | 0.82  | 2.28      | 0.24      | 3.47  | 1.00e-03 |
| Teicoplanin:FH1->REC        | -1.02 | 0.36      | 0.17      | -5.83 | < 2e-16  |
| Interferon beta-1b:FH1->ICU | 1.01  | 2.74      | 0.13      | 7.61  | < 2e-16  |
| Interferon beta-1b:FH1->REC | -0.14 | 0.87      | 0.05      | -2.84 | 5.00e-03 |
| Interferon beta-1b:FH2->DEA | 0.76  | 2.15      | 0.23      | 3.28  | 1.00e-03 |
| Anakinra:FH1->ICU           | 0.69  | 2.00      | 0.23      | 2.96  | 3.00e-03 |
| Anakinra:FH1->REC           | -0.82 | 0.44      | 0.13      | -6.35 | < 2e-16  |
| Tocilizumab:FH1->ICU        | 1.73  | 5.62      | 0.11      | 16.38 | < 2e-16  |
| Tocilizumab:FH1->DEA        | -0.38 | 0.68      | 0.12      | -3.21 | 1.00e-03 |
| Tocilizumab:FH1->REC        | -0.36 | 0.70      | 0.04      | -8.26 | < 2e-16  |
